# Supplementary material
Source: publisher figshare collection journal article supplement (https://gsajournals.figshare.com/ndownloader/files/13273001)
Supplement: Supplementary file 1 [file 13273001]

## Sheet: AdamTS-A FISH probe sequences
ccagcatatggcaaatcttg
gaactgcaaacagtgcccag
ctggacaatggagcaggaac
atggtaaaggcggtgggcag
gtcgtggttcatgttcaaga
gtgacatagggcatacactt
agcaccttgttgttgttctg
catcacgctggacatgatgt
accacggatgcatgtggatg
caaagtggcgggagcacttg
ggttttctcgagaaactcgg
aggtctccagacaggacttg
tcggtgccatagggaatgtg
cagggagtagatctctccag
cgaaactcagctggcactgg
ggacagtagccaaagtcatt
aggttcggttgcaccacaac
gcactgctcgttggagttac
cttgttggatacacacttgc
tcggtacttcttccgacttc
gacactggtgtgtgttgcac
ttcatcgcatagcactgctg
cggaatgttcatgttccgtc
cacttggtgtctgggttcac
atccttttcgtatttgggca
atgcggcagaatagcttgca
gaagtaggtgaccttcatgt
tcggtgaccatgctcttgag
cgttgacgcacttgtcgaag
caatcgagttgagctcgttg
gtggcatgtgtcattgcgac
acgagcagatttccggttac
catttagccccaggagattg
taaagtgtcttgttcggctc
ttttggtattcgcgtcacat
ccacgctgagtgattattat
tatgaagttctggtcgggat
tttccattaagcagttcgtt
caatggataggtcttgagga
gtgactccggcataaacgaa
actactagaaccggtgtact
gagtaggtcgtattcacctg
aagatcacgtgacagtttcc
cgtccagtgaaatgatctgt
taggacaagaggacggtgtc
tcataatccggtggcttgtc
atctcccagcgatagatctc
tcgcatagggaatcacagtt
